# Supplementary material for: β2-Homo-Amino Acid Scan of µ-Selective Opioid Tetrapeptide TAPP
Source: PubMed Central journal article supplement (PMC7288052; doi:10.3390/molecules25102461), 2020-05-25
Supplement: molecules-25-02461-s001.pdf [file molecules-25-02461-s001.pdf]

## Supplementary Materials to:

# $\beta^2$ -*homo*-Amino acid scan of $\mu$ -selective opioid tetrapeptide TAPP

by: Dagmara Tymecka\*, Piotr F. J. Lipiński, Piotr Kosson and Aleksandra Misicka\*

Corresponding authors: dulok@chem.uw.edu.pl; (D.T.), misicka@chem.uw.edu.pl (A.M.)

---

### SM-SYN: synthesis

**Table SM-SYN-1.** Analytical data of the synthesized peptides.

---

### SM-BIN: binding affinity

**Table SM-BIN-1.**  $\delta$ OR binding affinity of the studied compounds.

---

### SM-MOD: modelling

**Table SM-MOD-1.** Descriptive summary of the binding poses predicted by docking for TAPP and the derivatives.

**Figure SM-MOD-1.** Plot of  $pIC_{50}$  against the predicted by docking free energy of binding (mean in the cluster).

**Figure SM-MOD-2.** Plot of  $pIC_{50}$  against the predicted by docking free energy of binding (lowest in the cluster).

---

### SM-STAB: stability

**Figure SM-STAB-1.** HPLC chromatogram of a TAPP (**1**) sample in human plasma, taken at the start of stability testing.

**Figure SM-STAB-2.** HPLC chromatogram of a TAPP (**1**) sample in human plasma, taken at 48 h of stability testing.

**Figure SM-STAB-3.** HPLC chromatogram of a [(*R*)- $\beta^2$ hTyr<sup>1</sup>]-TAPP\* (**8**) sample in human plasma, taken at the start of stability testing.

**Figure SM-STAB-4.** HPLC chromatogram of a [(*R*)- $\beta^2$ hTyr<sup>1</sup>]-TAPP\* (**8**) sample in human plasma, taken at 48 h of stability testing.

**Figure SM-STAB-5.** HPLC chromatogram of a [(*R*)- $\beta^2$ h-*m*-Tyr<sup>1</sup>]-TAPP\* (**9**) sample in human plasma, taken at the start of stability testing.

**Figure SM-STAB-6.** HPLC chromatogram of a [(*R*)- $\beta^2$ h-*m*-Tyr<sup>1</sup>]-TAPP\* (**9**) sample in human plasma, taken at 48 h of stability testing.

**Figure SM-STAB-7.** HPLC chromatogram of a [(*S*)- $\beta^2$ hAla<sup>2</sup>]-TAPP (**10**) sample in human plasma, taken at the start of stability testing.

**Figure SM-STAB-8.** HPLC chromatogram of a [(*S*)- $\beta^2$ hAla<sup>2</sup>]-TAPP (**10**) sample in human plasma, taken at 4 h of stability testing.

**Figure SM-STAB-9.** HPLC chromatogram of [(*R*)- $\beta^2$ hPhe<sup>3</sup>]-TAPP (**11**) sample in human plasma, taken at the start of stability testing.

**Figure SM-STAB-10.** HPLC chromatogram of [(*R*)- $\beta^2$ hPhe<sup>3</sup>]-TAPP (**11**) sample in human plasma, taken at 48h of stability testing.

**Figure SM-STAB-11.** HPLC chromatogram of [(*R*)- $\beta^2$ hPhe<sup>4</sup>]-TAPP (**12**) sample in human plasma, taken at the start of stability testing.

**Figure SM-STAB-12.** HPLC chromatogram of [(*R*)- $\beta^2$ hPhe<sup>4</sup>]-TAPP (**12**) sample in human plasma, taken at 48 h of stability testing.

**Figure SM-STAB-13.** HPLC chromatogram of a [(*S*)- $\beta^2$ hTyr<sup>1</sup>]-TAPP\* (**13**) sample in human plasma, taken at the start of stability testing.

**Figure SM-STAB-14.** HPLC chromatogram of a [(*S*)- $\beta^2$ hTyr<sup>1</sup>]-TAPP\* (**13**) sample in human plasma, taken at 48 h of stability testing.

**Figure SM-STAB-15.** HPLC chromatogram of a [(*S*)- $\beta^2$ h-*m*-Tyr<sup>1</sup>]-TAPP\* (**14**) sample in human plasma, taken at the start of stability testing.

**Figure SM-STAB-16.** HPLC chromatogram of a [(*S*)- $\beta^2$ h-*m*-Tyr<sup>1</sup>]-TAPP\* (**14**) sample in human plasma, taken at 48 h of stability testing.

**Figure SM-STAB-17.** HPLC chromatogram of a [(*R*)- $\beta^2$ hAla<sup>2</sup>]-TAPP (**15**) sample in human plasma, taken at the start of stability testing.

**Figure SM-STAB-18.** HPLC chromatogram of a [(*R*)- $\beta^2$ hAla<sup>2</sup>]-TAPP (**15**) sample in human plasma, taken at 4 h of stability testing.

**Figure SM-STAB-19.** HPLC chromatogram of a [(*S*)- $\beta^2$ hPhe<sup>3</sup>]-TAPP (**16**) sample in human plasma, taken at the start of stability testing.

**Figure SM-STAB-20.** HPLC chromatogram of a [(*S*)- $\beta^2$ hPhe<sup>3</sup>]-TAPP (**16**) sample in human plasma, taken at 48 h of stability testing.

**Figure SM-STAB-21.** HPLC chromatogram of a [(*S*)- $\beta^2$ hPhe<sup>4</sup>]-TAPP (**17**) sample in human plasma, taken at the start of stability testing.

**Figure SM-STAB-22.** HPLC chromatogram of a [(*S*)- $\beta^2$ hPhe<sup>4</sup>]-TAPP (**17**) sample in human plasma, taken at 48 h of stability testing.

**Table SM-SYN-1.** Analytical data of the synthesized peptides.

| No.                                                                                                            | peptide                                                                                 | HPLC t <sub>R</sub><br>(min)* | HPLC t <sub>R</sub><br>(min)** | molecular<br>formula                                          | HR ESI-MS                            |                                    |                |
|----------------------------------------------------------------------------------------------------------------|-----------------------------------------------------------------------------------------|-------------------------------|--------------------------------|---------------------------------------------------------------|--------------------------------------|------------------------------------|----------------|
|                                                                                                                |                                                                                         |                               |                                |                                                               | calculated for<br>[M+H] <sup>+</sup> | measured for<br>[M+H] <sup>+</sup> | Diff.<br>[ppm] |
| 1                                                                                                              | H-Tyr-D-Ala-Phe-Phe-NH <sub>2</sub> (TAPP)                                              | 20.866                        | 18.017                         | C <sub>30</sub> H <sub>35</sub> N <sub>5</sub> O <sub>5</sub> | 546.2711                             | 546.2715                           | 0.73           |
| 8                                                                                                              | H-( <i>R</i> )-β <sup>2</sup> hTyr-D-Ala-Phe-Phe-NH <sub>2</sub> less polar             | 21.160                        | 18.672                         | C <sub>31</sub> H <sub>37</sub> N <sub>5</sub> O <sub>5</sub> | 560.2867                             | 560.2885                           | 3.21           |
| 9                                                                                                              | H-( <i>R</i> )-β <sup>2</sup> h- <i>m</i> -Tyr-D-Ala-Phe-Phe-NH <sub>2</sub> less polar | 21.831                        | 19.240                         | C <sub>31</sub> H <sub>37</sub> N <sub>5</sub> O <sub>5</sub> | 560.2867                             | 560.2885                           | 3.21           |
| 10                                                                                                             | H-Tyr-( <i>S</i> )-β <sup>2</sup> hAla-Phe-Phe-NH <sub>2</sub>                          | 20.059                        | 17.340                         | C <sub>31</sub> H <sub>37</sub> N <sub>5</sub> O <sub>5</sub> | 560.2867                             | 560.2893                           | 4.64           |
| 11                                                                                                             | H-Tyr-D-Ala-( <i>R</i> )-β <sup>2</sup> hPhe-Phe-NH <sub>2</sub>                        | 19.234                        | 16.234                         | C <sub>31</sub> H <sub>37</sub> N <sub>5</sub> O <sub>5</sub> | 560.2867                             | 560.2879                           | 2.14           |
| 12                                                                                                             | H-Tyr-D-Ala-Phe-( <i>R</i> )-β <sup>2</sup> hPhe-NH <sub>2</sub>                        | 20.690                        | 18.316                         | C <sub>31</sub> H <sub>37</sub> N <sub>5</sub> O <sub>5</sub> | 560.2867                             | 560.2889                           | 3.93           |
| 13                                                                                                             | H-( <i>S</i> )-β <sup>2</sup> hTyr-D-Ala-Phe-Phe-NH <sub>2</sub> more polar             | 19.585                        | 17.019                         | C <sub>31</sub> H <sub>37</sub> N <sub>5</sub> O <sub>5</sub> | 560.2867                             | 560.2874                           | 1.25           |
| 14                                                                                                             | H-( <i>S</i> )-β <sup>2</sup> h- <i>m</i> -Tyr-D-Ala-Phe-Phe-NH <sub>2</sub> more polar | 20.039                        | 17.711                         | C <sub>31</sub> H <sub>37</sub> N <sub>5</sub> O <sub>5</sub> | 560.2867                             | 560.2879                           | 2.14           |
| 15                                                                                                             | H-Tyr-( <i>R</i> )-β <sup>2</sup> hAla-Phe-Phe-NH <sub>2</sub>                          | 19.496                        | 16.876                         | C <sub>31</sub> H <sub>37</sub> N <sub>5</sub> O <sub>5</sub> | 560.2867                             | 560.2880                           | 2.32           |
| 16                                                                                                             | H-Tyr-D-Ala-( <i>S</i> )-β <sup>2</sup> hPhe-Phe-NH <sub>2</sub>                        | 21.037                        | 19.467                         | C <sub>31</sub> H <sub>37</sub> N <sub>5</sub> O <sub>5</sub> | 560.2867                             | 560.2879                           | 2.14           |
| 17                                                                                                             | H-Tyr-D-Ala-Phe-( <i>S</i> )-β <sup>2</sup> hPhe-NH <sub>2</sub>                        | 20.611                        | 18.298                         | C <sub>31</sub> H <sub>37</sub> N <sub>5</sub> O <sub>5</sub> | 560.2867                             | 560.2882                           | 2.68           |
| *linear gradient was applied: 3–97% B for 40 min, phase (A): 0.1% TFA in water; phase (B): 0.1% TFA in ACN.    |                                                                                         |                               |                                |                                                               |                                      |                                    |                |
| **linear gradient was applied: 30–97% B for 30 min, phase (A): 0.1% TFA in water; phase (B): 0.1% TFA in MeOH. |                                                                                         |                               |                                |                                                               |                                      |                                    |                |

**Table SM-BIN-1.**  $\delta$ OR binding affinity of the studied compounds.

| No.                                                                                  | Compound                                              | IC <sub>50</sub> [nM] <sup>1</sup> |
|--------------------------------------------------------------------------------------|-------------------------------------------------------|------------------------------------|
|                                                                                      |                                                       | $\delta$ OR <sup>2</sup>           |
| 1                                                                                    | TAPP                                                  | 616                                |
| <b>backbone expansion without changing the spatial positioning of the side-chain</b> |                                                       |                                    |
| 8 <sup>3</sup>                                                                       | [(R)- $\beta^2$ hTyr <sup>1</sup> ]-TAPP*             | >10000                             |
| 9 <sup>3</sup>                                                                       | [(R)- $\beta^2$ h- <i>m</i> -Tyr <sup>1</sup> ]-TAPP* | >10000                             |
| 10                                                                                   | [(S)- $\beta^2$ hAla <sup>2</sup> ]-TAPP              | >10000                             |
| 11                                                                                   | [(R)- $\beta^2$ hPhe <sup>3</sup> ]-TAPP              | 794                                |
| 12                                                                                   | [(R)- $\beta^2$ hPhe <sup>4</sup> ]-TAPP              | 708                                |
| <b>backbone expansion with changing the spatial positioning of the side-chain</b>    |                                                       |                                    |
| 13 <sup>3</sup>                                                                      | [(S)- $\beta^2$ hTyr <sup>1</sup> ]-TAPP*             | >10000                             |
| 14 <sup>3</sup>                                                                      | [(S)- $\beta^2$ h- <i>m</i> -Tyr <sup>1</sup> ]-TAPP* | >10000                             |
| 15                                                                                   | [(R)- $\beta^2$ hAla <sup>2</sup> ]-TAPP              | >10000                             |
| 16                                                                                   | [(S)- $\beta^2$ hPhe <sup>3</sup> ]-TAPP              | 890                                |
| 17                                                                                   | [(S)- $\beta^2$ hPhe <sup>4</sup> ]-TAPP              | 417                                |

<sup>1</sup> IC<sub>50</sub>, half-maximal inhibitory concentration mean of three determinations in duplicate. <sup>2</sup> Radioligand: 0.5 nM [<sup>3</sup>H]DELT II. <sup>3</sup> Absolute configuration determined *per analogiam* to [(R/S)- $\beta^2$ hPhe<sup>1</sup>]-TAPP (see Section 2.1 in the main text for details)

**Table SM-MOD-1.** Descriptive summary of the binding poses predicted by docking for TAPP and the derivatives.

| No        | Structure                                                          | Xxx1 interactions | H-bond with Tyr148 | Position of Xxx <sup>3</sup> side-chain | Position of Xxx <sup>4</sup> side-chain | Interactions of C-terminal amide |
|-----------|--------------------------------------------------------------------|-------------------|--------------------|-----------------------------------------|-----------------------------------------|----------------------------------|
|           | DAMGO in 6DDF                                                      | SA1               | -                  | n/a                                     | SD1                                     | n/a                              |
| <b>1</b>  | TAPP                                                               | SA1               | -                  | SC1                                     | SD1                                     | SE1                              |
| <b>8</b>  | [( <i>R</i> )-β <sup>2</sup> hTyr <sup>1</sup> ]-TAPP*             | SA1               | -                  | SC2                                     | SC4                                     | SE2                              |
| <b>9</b>  | [( <i>R</i> )-β <sup>2</sup> h- <i>m</i> -Tyr <sup>1</sup> ]-TAPP* | SA2               | -                  | SC1                                     | SD1                                     | SE1                              |
| <b>10</b> | [( <i>S</i> )-β <sup>2</sup> hAla <sup>2</sup> ]-TAPP              | SA3               | +                  | SC4                                     | SC3                                     | SE2                              |
| <b>11</b> | [( <i>R</i> )-β <sup>2</sup> hPhe <sup>3</sup> ]-TAPP              | SA4               | +                  | to solvent                              | SD1                                     | SE2                              |
| <b>12</b> | [( <i>R</i> )-β <sup>2</sup> hPhe <sup>4</sup> ]-TAPP              | SA4               | -                  | SC4                                     | SD1                                     | SE2                              |
| <b>13</b> | [( <i>S</i> )-β <sup>2</sup> hTyr <sup>1</sup> ]-TAPP*             | SA5               | -                  | SD1                                     | SC4                                     | to solvent                       |
| <b>14</b> | [( <i>S</i> )-β <sup>2</sup> h- <i>m</i> -Tyr <sup>1</sup> ]-TAPP* | SA6               | -                  | SC1                                     | SD1                                     | SE1                              |
| <b>15</b> | [( <i>R</i> )-β <sup>2</sup> hAla <sup>2</sup> ]-TAPP              | SA6               | +                  | SD1                                     | SD2                                     | SE3                              |
| <b>16</b> | [( <i>S</i> )-β <sup>2</sup> hPhe <sup>3</sup> ]-TAPP              | SA7               | -                  | SC4                                     | SC3                                     | solvent                          |
| <b>17</b> | [( <i>S</i> )-β <sup>2</sup> hPhe <sup>4</sup> ]-TAPP              | SA1               | -                  | SC5                                     | SD1                                     | SE2                              |

SA1, dispersive contacts: Ile296, His297, Val300

SA2, dispersive contacts: Met151

SA3, H-bond: Ile296 (backbone); dispersive contacts: Ile296, Val300, Ile322

SA4, H-bond: Lys233 (backbone); dispersive contacts: Val300

SA5, dispersive contacts: Ile296, Val300, Val236

SA6, H-bond: Ile296 (backbone); dispersive contacts: Val236, Ile296

SA7, H-bond: Trp293 (indole); dispersive contacts: Ile 296, Val300

SC1, dispersive contacts: Asn127, Trp318, His319

SC2, intramolecular stack NH<sup>+</sup>···Xxx<sup>3</sup>

SC3, dispersive contacts: Cys217

SC4, dispersive contacts: Leu219

SC5, intramolecular stack Xxx<sup>4</sup>···Xxx<sup>3</sup>

SD1, dispersive contacts: Trp133, Ile144, Cys217

SD2, dispersive contacts: Val300, Trp318

SE1, H-bond: Thr218

SE2, H-bond: Asp216

SE3, H-bond: Glu229

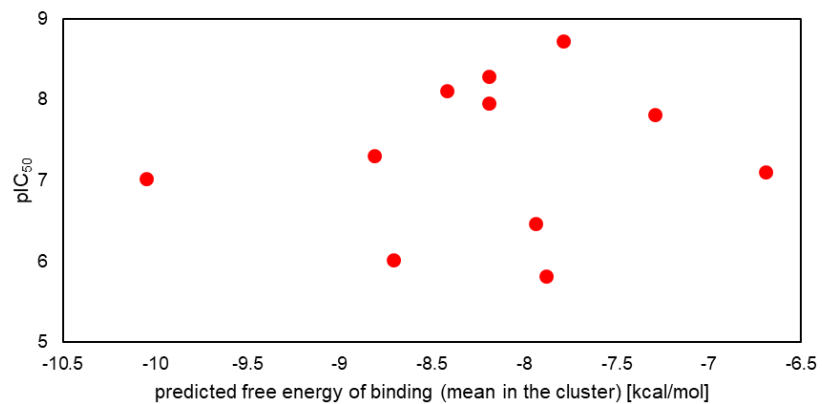

**Figure SM-MOD-1.** Plot of pIC<sub>50</sub> against the predicted by docking free energy of binding (mean in the cluster).

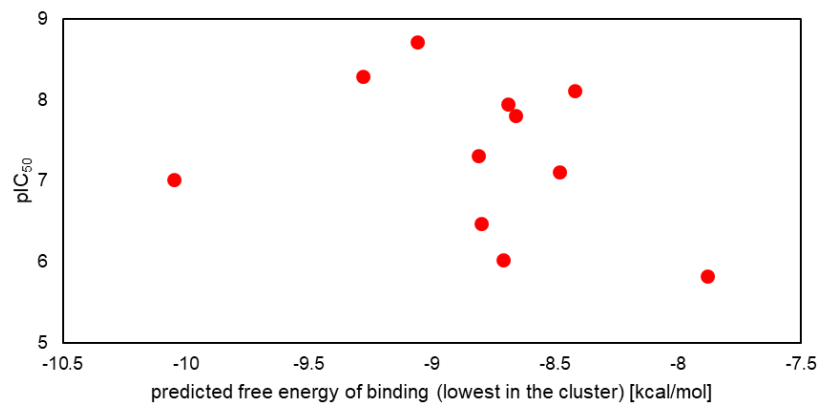

**Figure SM-MOD-2.** Plot of pIC<sub>50</sub> against the predicted by docking free energy of binding (lowest in the cluster).

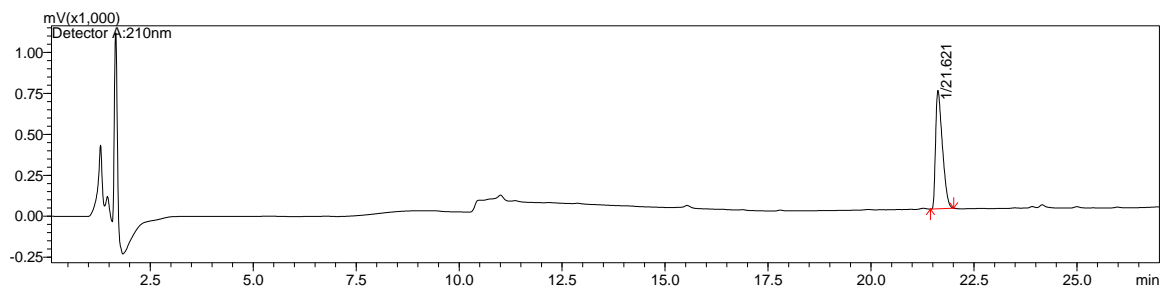

**Figure SM-STAB-1.** HPLC chromatogram of a TAPP (1) sample in human plasma, taken at the start of stability testing.

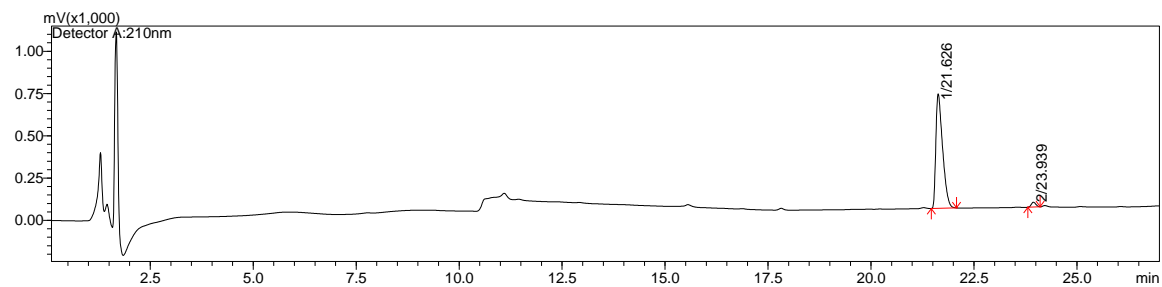

**Figure SM-STAB-2.** HPLC chromatogram of a TAPP (1) sample in human plasma, taken at 48 h of stability testing.

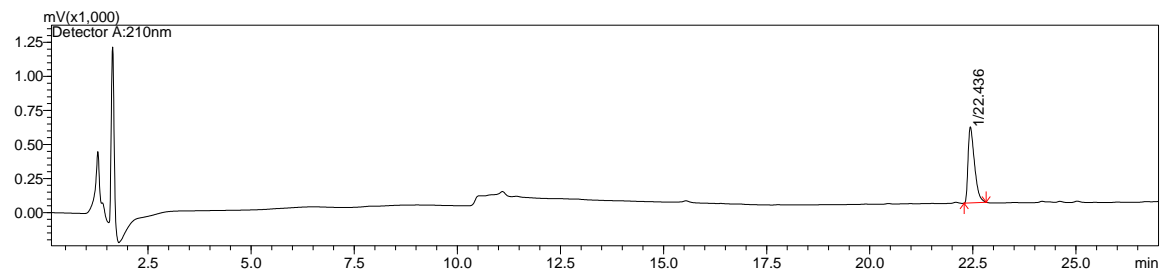

**Figure SM-STAB-3.** HPLC chromatogram of a [(R)-β<sup>2</sup>hTyr<sup>1</sup>]-TAPP\* (8) sample in human plasma, taken at the start of stability testing.

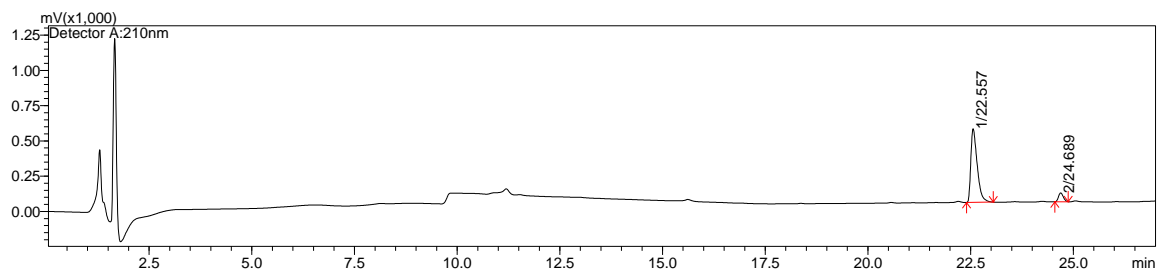

**Figure SM-STAB-4.** HPLC chromatogram of a [(*R*)-β<sup>2</sup>hTyr<sup>1</sup>]-TAPP\* (**8**) sample in human plasma, taken at 48 h of stability testing.

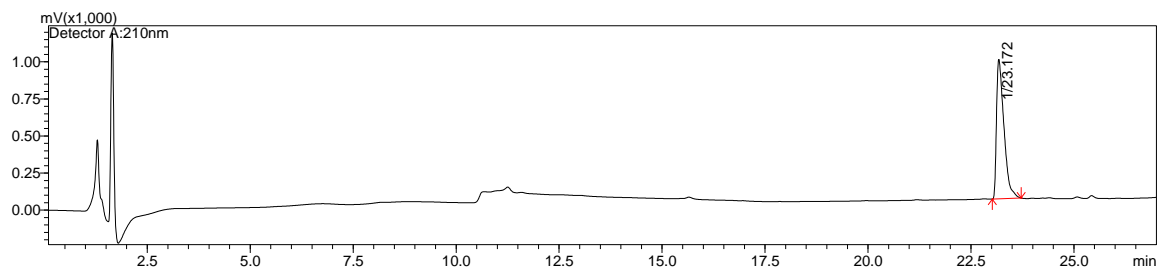

**Figure SM-STAB-5.** HPLC chromatogram of a [(*R*)-β<sup>2</sup>h-*m*-Tyr<sup>1</sup>]-TAPP\* (**9**) sample in human plasma, taken at the start of stability testing.

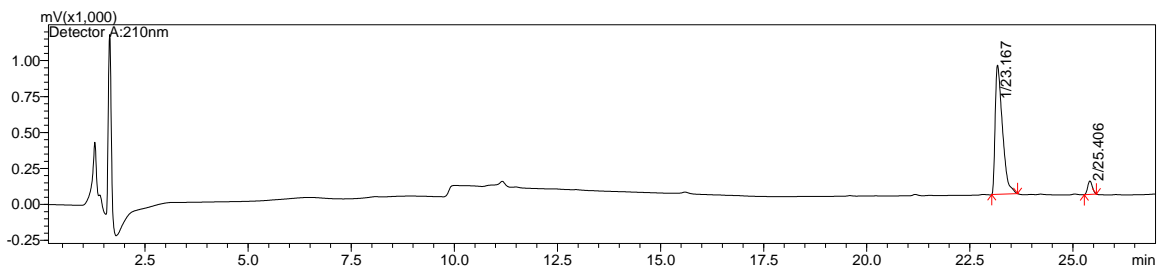

**Figure SM-STAB-6.** HPLC chromatogram of a [(*R*)-β<sup>2</sup>h-*m*-Tyr<sup>1</sup>]-TAPP\* (**9**) sample in human plasma, taken at 48 h of stability testing.

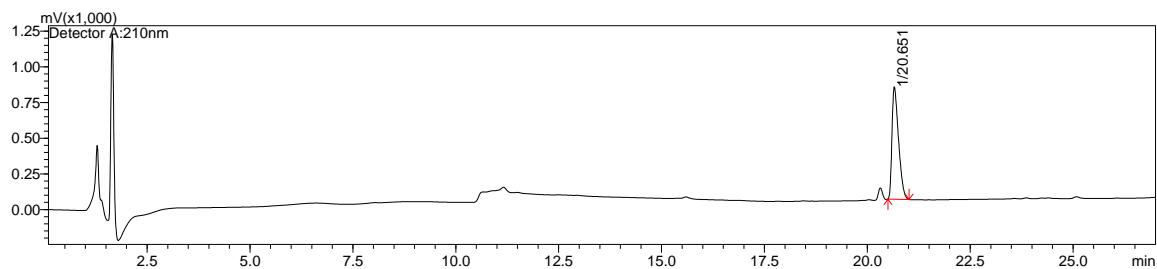

**Figure SM-STAB-7.** HPLC chromatogram of a [(*S*)-β<sup>2</sup>hAla<sup>2</sup>]-TAPP (**10**) sample in human plasma, taken at the start of stability testing.

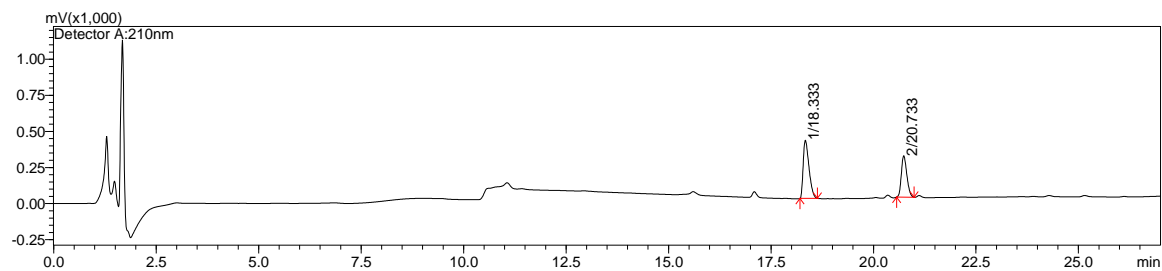

**Figure SM-STAB-8.** HPLC chromatogram of a [(*S*)-β<sup>2</sup>hAla<sup>2</sup>]-TAPP (**10**) sample in human plasma, taken at 4 h of stability testing.

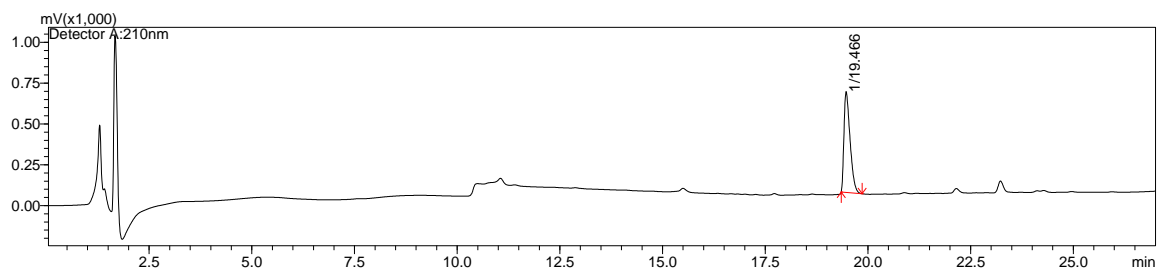

**Figure SM-STAB-9.** HPLC chromatogram of [(*R*)-β<sup>2</sup>hPhe<sup>3</sup>]-TAPP (**11**) sample in human plasma, taken at the start of stability testing.



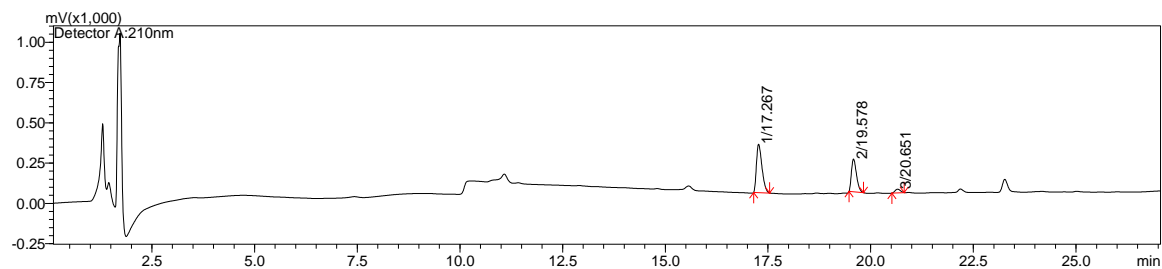

**Figure SM-STAB-10.** HPLC chromatogram of [(*R*)- $\beta^2$ hPhe<sup>3</sup>]-TAPP (**11**) sample in human plasma, taken at 48h of stability testing.

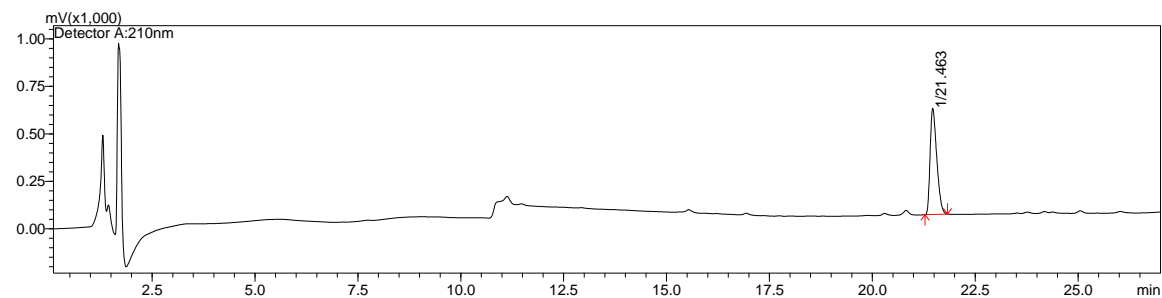

**Figure SM-STAB-11.** HPLC chromatogram of [(*R*)- $\beta^2$ hPhe<sup>4</sup>]-TAPP (**12**) sample in human plasma, taken at the start of stability testing.

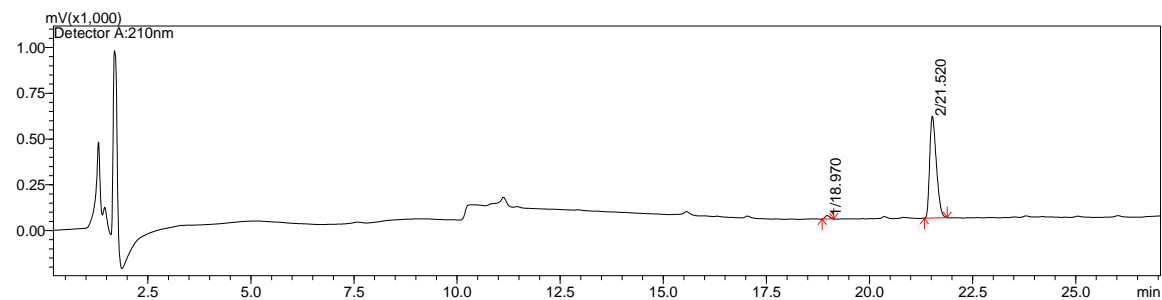

**Figure SM-STAB-12.** HPLC chromatogram of [(*R*)- $\beta^2$ hPhe<sup>4</sup>]-TAPP (**12**) sample in human plasma, taken at 48 h of stability testing.

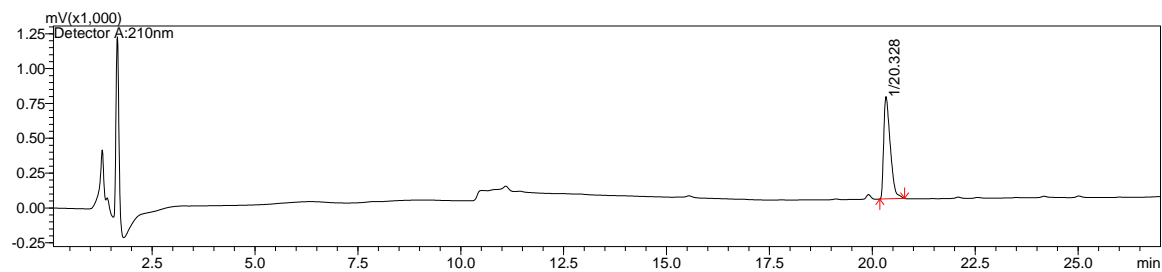

**Figure SM-STAB-13.** HPLC chromatogram of a [(S)-β<sup>2</sup>hTyr<sup>1</sup>]-TAPP\* (**13**) sample in human plasma, taken at the start of stability testing.

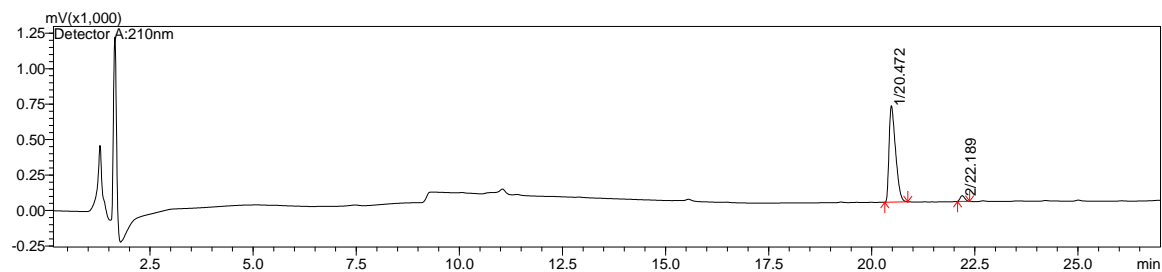

**Figure SM-STAB-14.** HPLC chromatogram of a [(S)-β<sup>2</sup>hTyr<sup>1</sup>]-TAPP\* (**13**) sample in human plasma, taken at 48 h of stability testing.

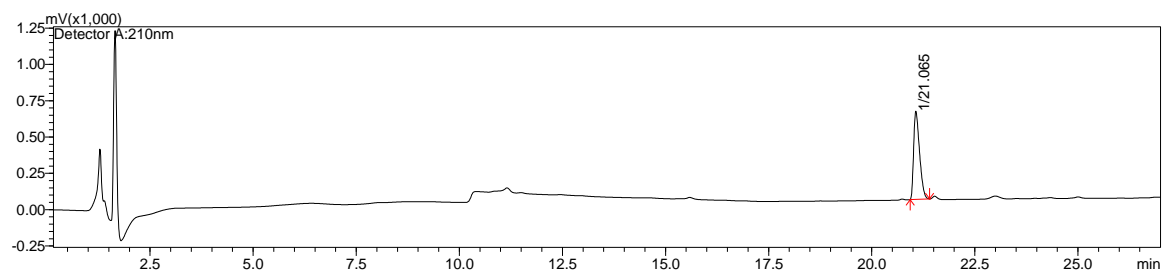

**Figure SM-STAB-15.** HPLC chromatogram of a [(*S*)- $\beta^2$ h-*m*-Tyr<sup>1</sup>]-TAPP\* (**14**) sample in human plasma, taken at the start of stability testing.

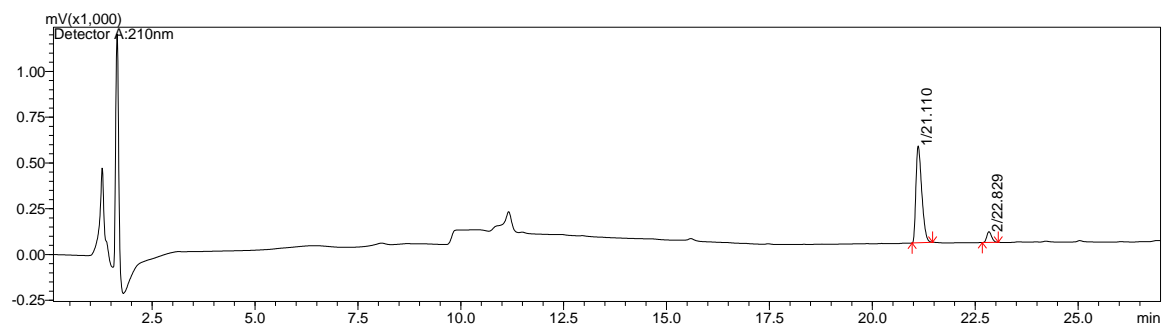

**Figure SM-STAB-16.** HPLC chromatogram of a [(*S*)- $\beta^2$ h-*m*-Tyr<sup>1</sup>]-TAPP\* (**14**) sample in human plasma, taken at 48 h of stability testing.

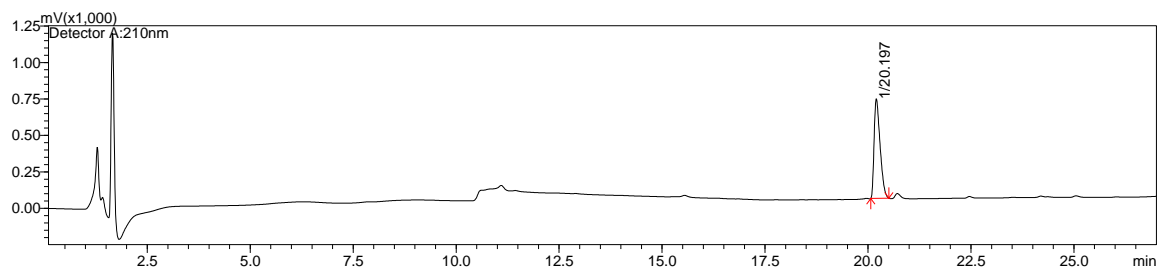

**Figure SM-STAB-17.** HPLC chromatogram of a [(*R*)-β<sup>2</sup>hAla<sup>2</sup>]-TAPP (**15**) sample in human plasma, taken at the start of stability testing.

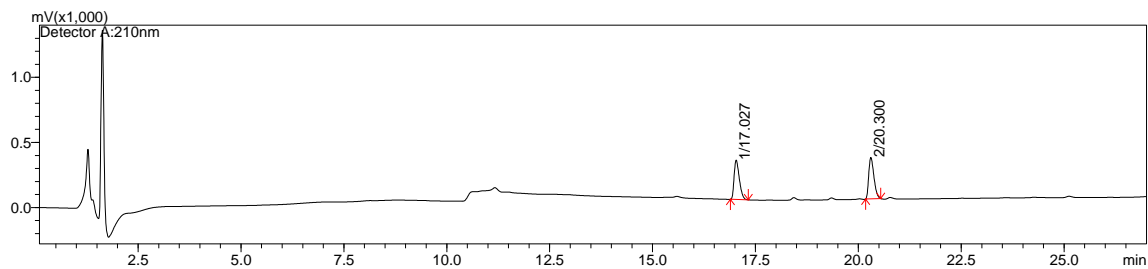

**Figure SM-STAB-18.** HPLC chromatogram of a [(*R*)-β<sup>2</sup>hAla<sup>2</sup>]-TAPP (**15**) sample in human plasma, taken at 4 h of stability testing.

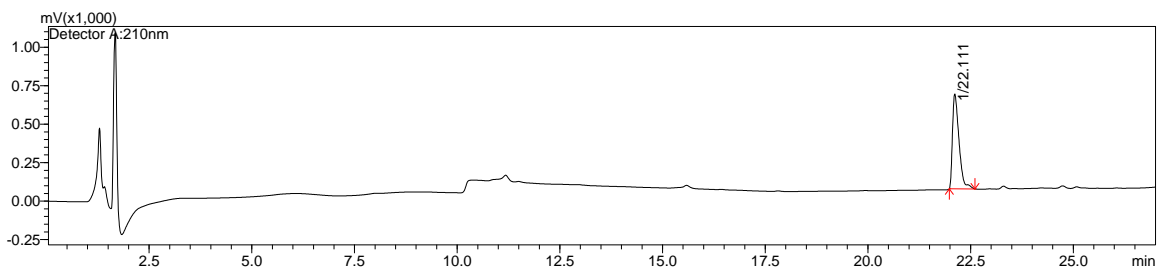

**Figure SM-STAB-19.** HPLC chromatogram of a [(*S*)-β<sup>2</sup>hPhe<sup>3</sup>]-TAPP (**16**) sample in human plasma, taken at the start of stability testing.

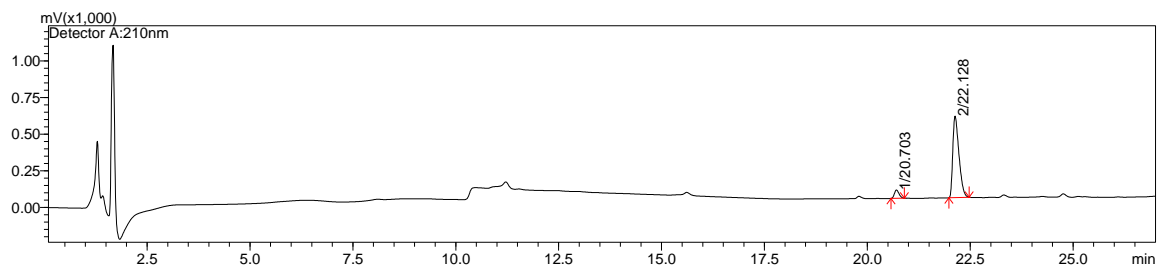

**Figure SM-STAB-20.** HPLC chromatogram of a [(S)- $\beta^2$ hPhe<sup>3</sup>]-TAPP (**16**) sample in human plasma, taken at 48 h of stability testing.

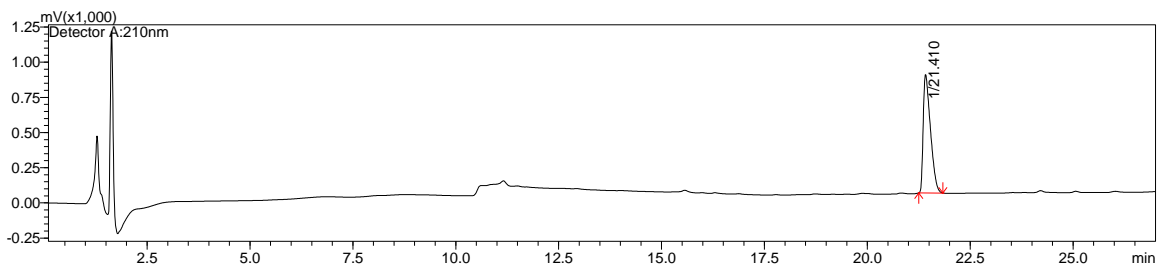

**Figure SM-STAB-21.** HPLC chromatogram of a [(S)- $\beta^2$ hPhe<sup>4</sup>]-TAPP (**17**) sample in human plasma, taken at the start of stability testing.

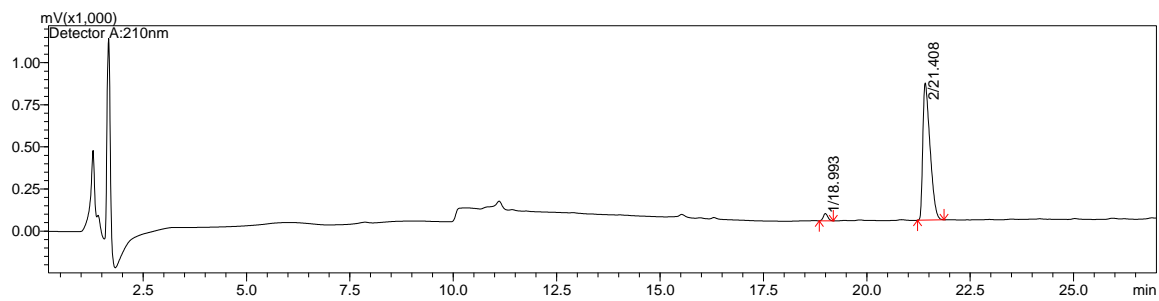

**Figure SM-STAB-22.** HPLC chromatogram of a [(S)- $\beta^2$ hPhe<sup>4</sup>]-TAPP (**17**) sample in human plasma, taken at 48 h of stability testing.
